# Supplementary material
Source: publisher site journal article supplement (https://www.spandidos-publications.com/4004/downloadSupplementary)

Figure S1. The direct effects of bindarit treatment on CRC cells. (A) Cell Counting Kit-8 assay results demonstrated that treatment with 100  $\mu\text{M}$  bindarit did not have any significant effects on the proliferation of HCT-116 and HT-29 cells after 1-3 days of culture. (B) Wound healing (scale bar, 400  $\mu\text{m}$ ) indicated that treatment with bindarit at a concentration of 100  $\mu\text{M}$  did not show any significant effects on the migration of HCT-116 and HT-29 cells. CRC, colorectal cancer; EGCG, epigallocatechin-3-gallate; *N.S.*, not significant.

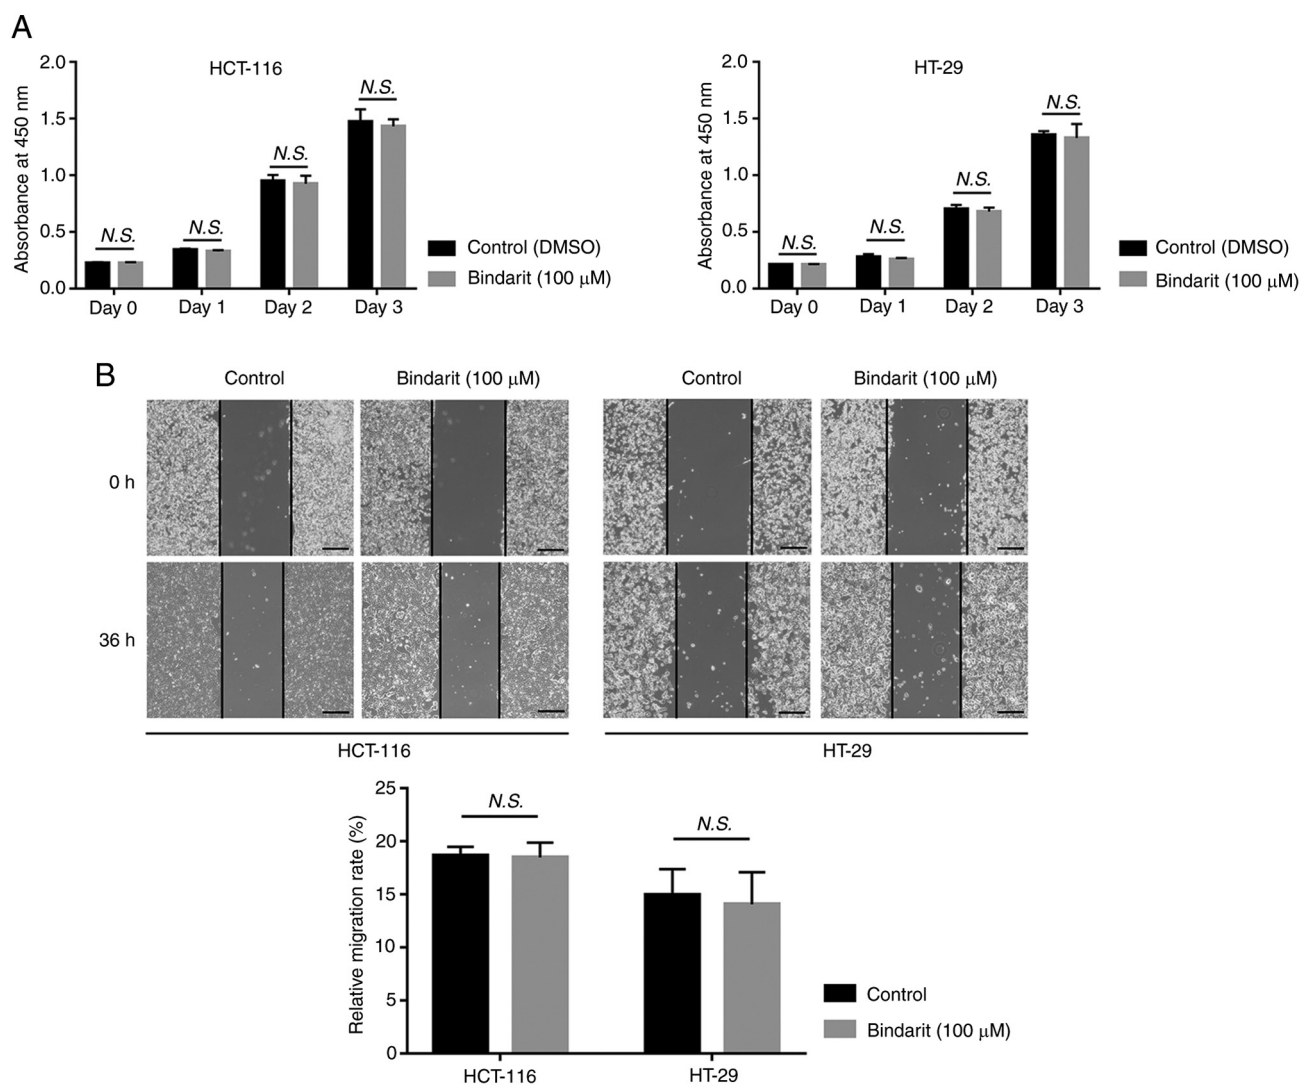

Supplement: Supplementary file 1 [file downloadSupplementary]
